# Supplementary figures and images for: Surface modification of InVO4 nanoparticles on WO3 plate array films for improved photoelectrochemical performance
Source: Royal Society of Chemistry journal article supplement (doi:10.1039/c6ra07629g), 2016-01-01

## Supporting Information

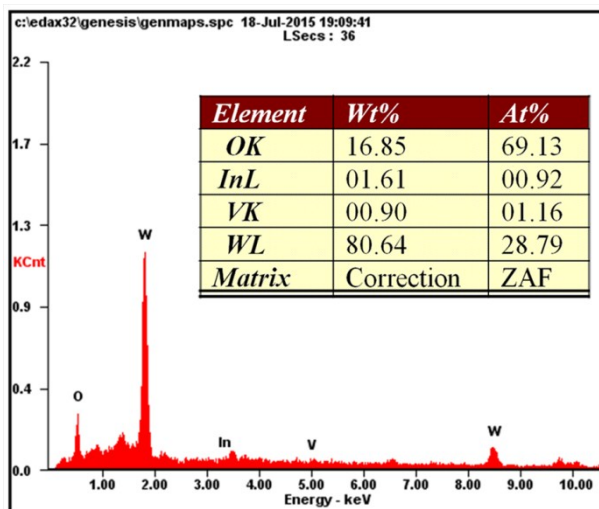

Fig. S1 The EDS spectra of InVO<sub>4</sub>/WO<sub>3</sub> films

Supplement: c6ra07629g1.pdf [file c6ra07629g1.pdf]
